# Supplementary material for: Beyond Limits: Charting New Horizons in Glioma Tumor Classification through Hybrid Quantum Computing with The Cancer Genome Atlas (TCGA) Data
Source: Research Square preprint supplement (doi:10.21203/rs.3.rs-3876410/v1), 2024-01-21
Supplement: Supplementary file 1 [file ffbc98df031938d08209c87f.docx]

**Appendix**

The circuit structures of the six generated VQC models and their corresponding hyperparameters, such as feature maps, parameterized quantum circuit structures, and optimization methods:

**
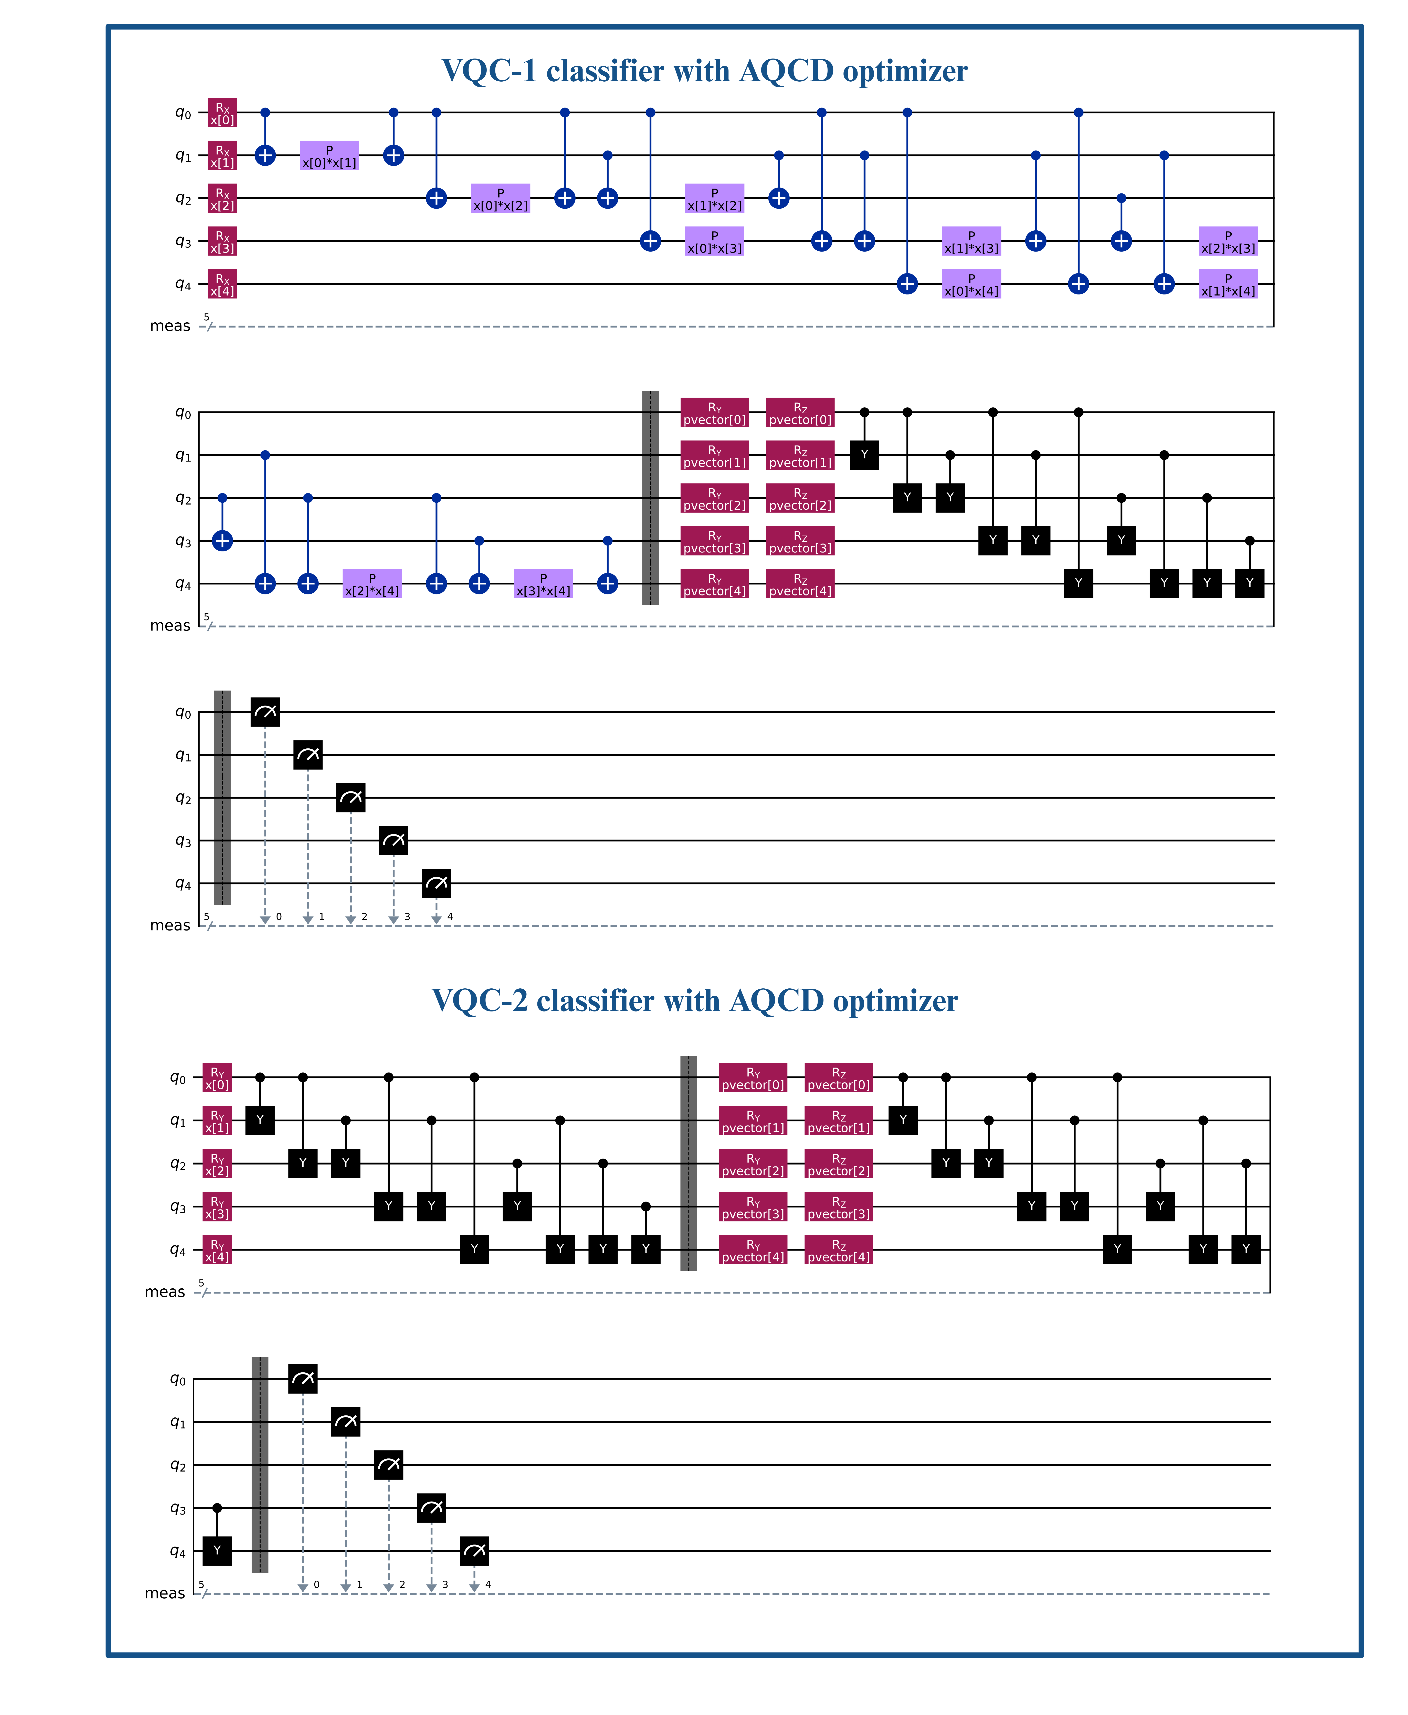
**

**
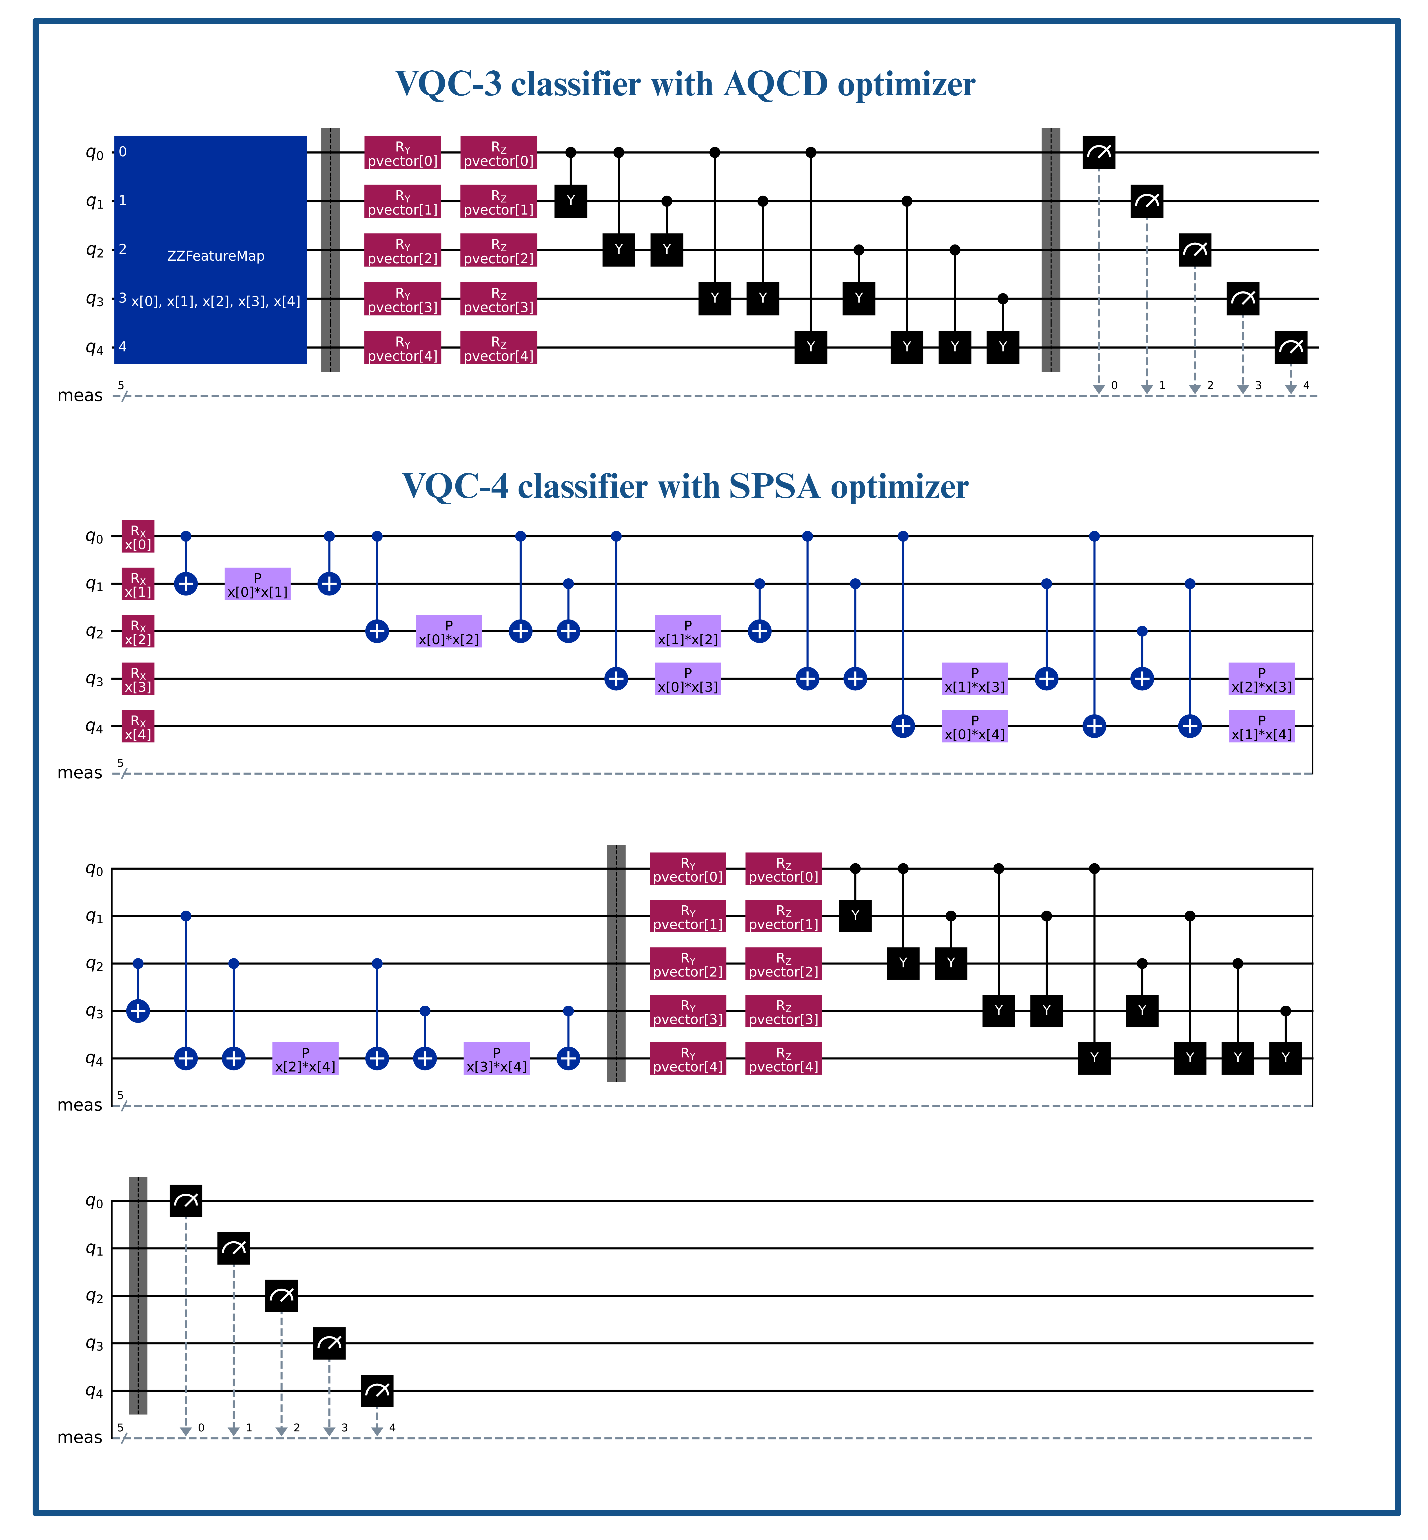

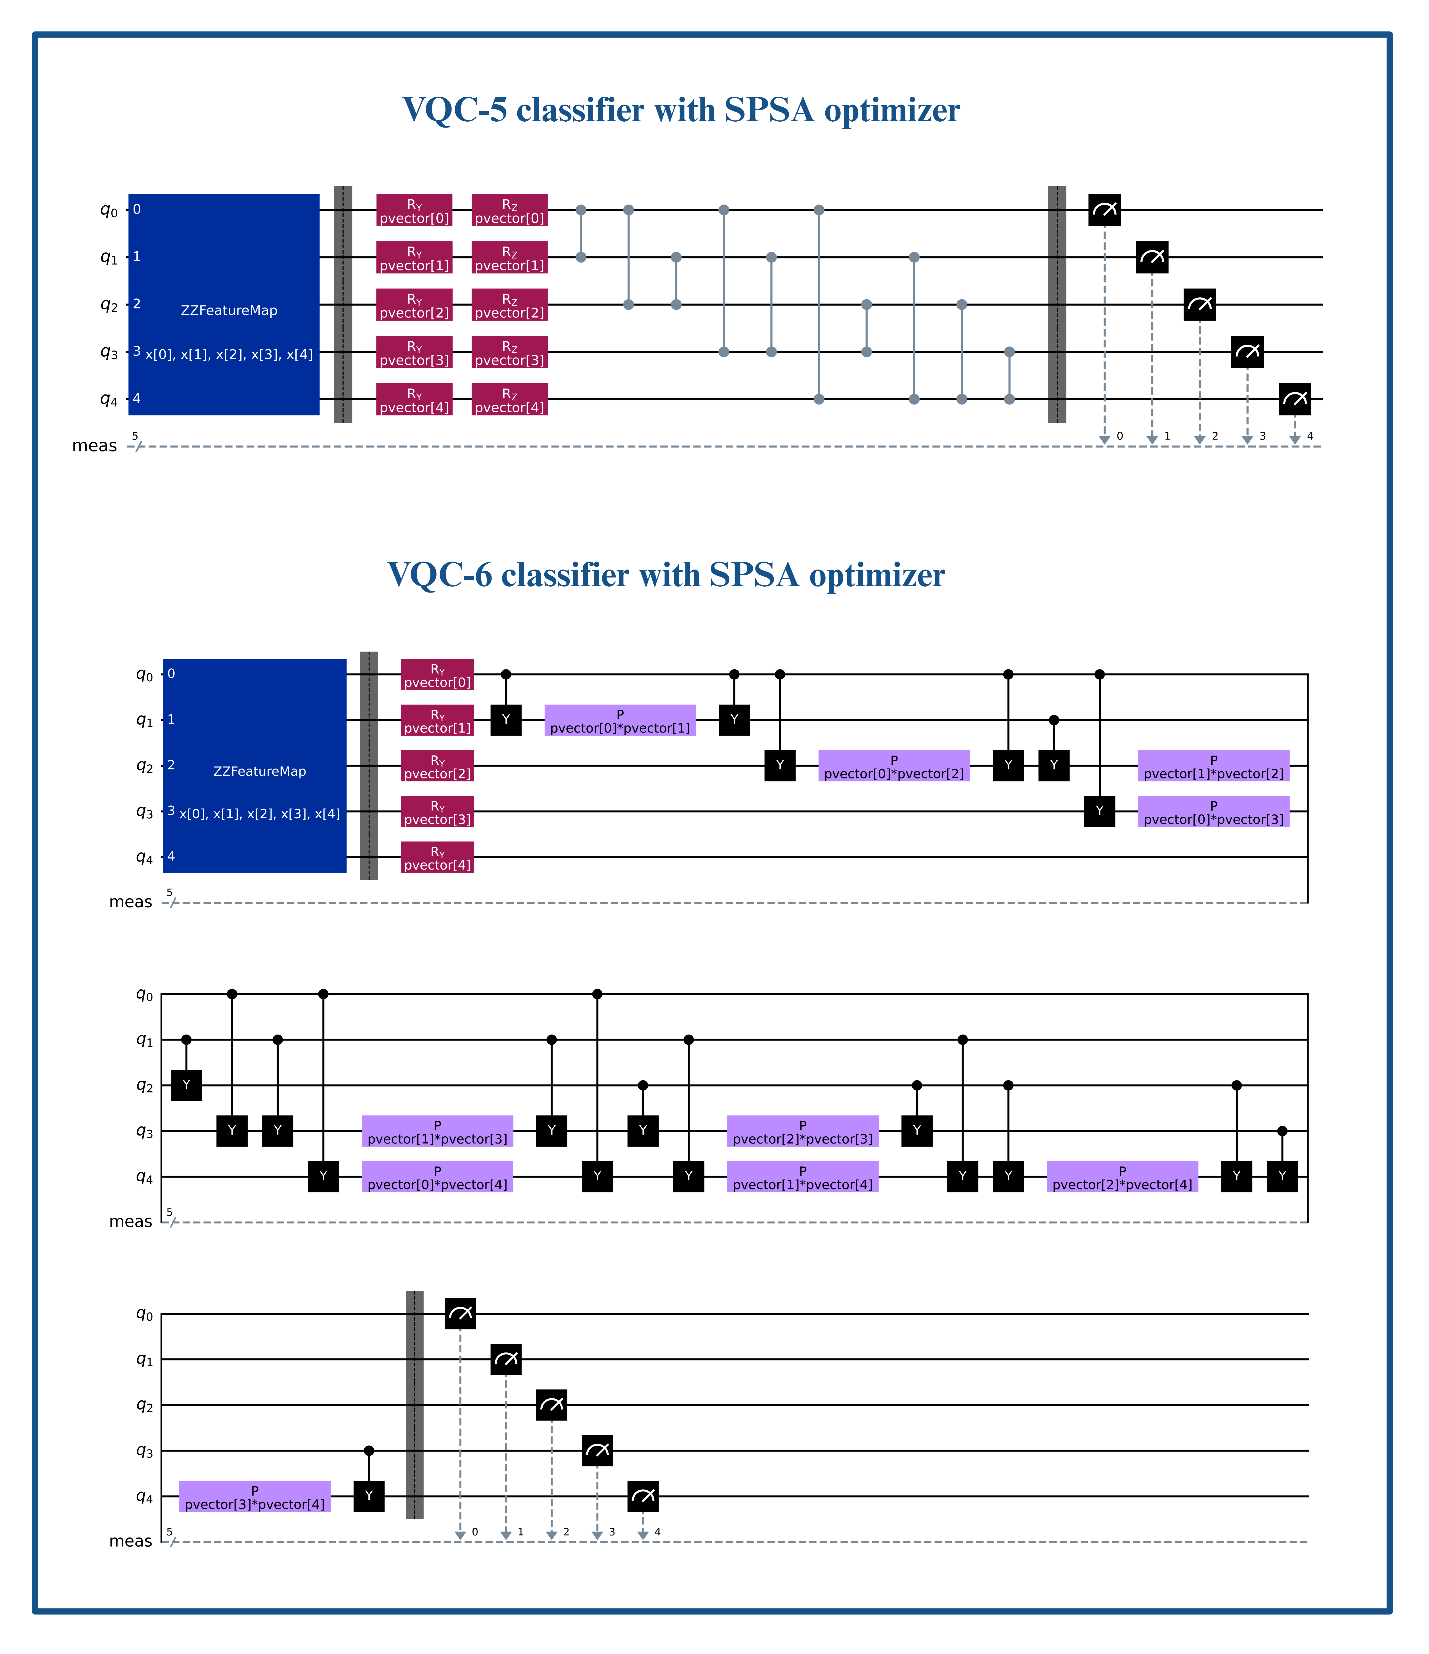
**
